# Supplementary material for: Structural basis of ClpXP recognition and unfolding of ssrA-tagged substrates
Source: eLife journal article supplement (doi:10.7554/elife.61496), 2020-10-22
Supplement: supp [file elife-61496-supp-v1.zip]

Archive with 10 entries (10 files):
- elife_poa_e61496_Video_1.mp4
- elife_poa_e61496_Video_2.mp4
- elife_poa_e61496_Video_3.mp4
- elife_poa_e61496_Video_4.mp4
- elife_poa_e61496_Transparent_Reporting_File.pdf
- elife_poa_e61496_Figure_1_figure_supplement_1.ai
- elife_poa_e61496_Figure_1_figure_supplement_2.ai
- elife_poa_e61496_Figure_1_figure_supplement_3.ai
- elife_poa_e61496_Figure_2_figure_supplement_1.ai
- elife_poa_e61496_Figure_2_figure_supplement_2.ai
